# Supplementary material for: A thermally stable nitrogen-rich energetic material—3,4,5-triamino-1-tetrazolyl-1,2,4-triazole (TATT)
Source: Royal Society of Chemistry journal article supplement (doi:10.1039/b908214j), 2009-01-01
Supplement: b908214j.pdf [file b908214j.pdf]

## Supporting Information

Belonging to the manuscript

# **A thermally stable nitrogen-rich energetic material - 3,4,5-triamino-1-tetrazolyl-1,2,4-triazole (TATT)**

Guo-Hong Tao, Brendan Twamley, and Jean'ne M. Shreeve\*

Department of Chemistry, University of Idaho, Moscow, Idaho, 83844-2343, USA  
[jshreeve@uidaho.edu](mailto:jshreeve@uidaho.edu)

**S2** *Ab initio* computational data.

**S3-S8** X-ray crystallographic experimental detail and data of crystal TATT·HNO<sub>3</sub>.

**Table S1** Calculated (B3LYP/6-31+G\*\*//MP2/6-311++G\*\*) Total Energy ( $E_0$ ), Zero-Point Energy (ZPE), Values of Thermal Correction ( $H_T$ ), and Heats of Formation (HOF, gas) of the compounds.

| Name                            | $E_0$<br>(au) | ZPE<br>(au) | $H_T$<br>(kJ/mol) | HOF<br>(kJ/mol)      |
|---------------------------------|---------------|-------------|-------------------|----------------------|
| TATT                            | -663.7850126  | 0.137642    | 31.7              | 598.8                |
| 1,2,3,4-tetrazole               | -257.6538704  | 0.046855    | 11.6              | 314.1                |
| Guanidine                       | -204.8735031  | 0.075945    | 14.4              | 26.0                 |
| CH <sub>4</sub>                 | -40.3796224   | 0.044793    | 10.0              | -74.6 <sup>[1]</sup> |
| CH <sub>3</sub> NH <sub>2</sub> | -95.59384     | 0.06403     | 11.5              | -22.5 <sup>[1]</sup> |
| NH <sub>2</sub> NH <sub>2</sub> | -111.5836915  | 0.05331     | 11.0              | 95.4 <sup>[1]</sup>  |
| NH <sub>3</sub>                 | -56.4154647   | 0.034384    | 10.0              | -45.9 <sup>[1]</sup> |
| CH <sub>2</sub> =NH             | -94.3808863   | 0.039928    | 10.1              | 86.7                 |

### Geometry coordinates

B3LYP/6-31+G(d,p) optimized geometries (Å)  
 3,4,5-Triamino-1-tetrazolyl-1,2,4-triazole (TATT)

|   |           |           |           |
|---|-----------|-----------|-----------|
| C | 1.865698  | -0.964459 | -0.009536 |
| N | 1.993989  | 0.408111  | -0.044825 |
| N | 2.965568  | -1.771083 | -0.052951 |
| N | 0.623382  | -1.354618 | -0.005449 |
| C | 0.720346  | 0.989725  | -0.026780 |
| N | -0.102576 | -0.140135 | -0.026403 |
| C | -1.474645 | -0.151648 | -0.007716 |
| N | 3.200578  | 1.095764  | 0.054612  |
| N | -2.226036 | -1.289943 | 0.002742  |
| N | -3.473663 | -0.889166 | 0.017229  |
| N | -3.440829 | 0.431296  | 0.015106  |
| N | -2.213046 | 0.962129  | 0.000315  |
| H | 2.812682  | -2.727191 | 0.234296  |
| H | 3.825834  | -1.340184 | 0.259426  |
| H | 3.123083  | 1.753314  | 0.830976  |
| H | 3.324497  | 1.651520  | -0.791144 |
| H | -4.278648 | 0.997212  | 0.023513  |
| N | 0.527846  | 2.253362  | -0.004673 |
| H | -0.462320 | 2.483603  | 0.017218  |

### References

[1] D. R. Lide, ed., "Standard Thermodynamic Properties of Chemical Substances" in *CRC Handbook of Chemistry and Physics, Internet Version 2007, (87th Edition)*, <<http://www.hbcpnetbase.com>>, Taylor and Francis, Boca Raton, FL, 2007.

**Table S2.** Atomic coordinates ( $\times 10^4$ ) and equivalent isotropic displacement parameters ( $\text{\AA}^2 \times 10^3$ ) for crystal TATT·HNO<sub>3</sub>. U(eq) is defined as one third of the trace of the orthogonalized  $U^{ij}$  tensor.

|       | x        | y       | z        | U(eq) |
|-------|----------|---------|----------|-------|
| C(5)  | 9105(1)  | 3093(1) | 11171(2) | 14(1) |
| C(7)  | 7705(1)  | 4296(1) | 9226(2)  | 14(1) |
| C(11) | 6848(1)  | 2587(1) | 7982(2)  | 14(1) |
| N(1)  | 9661(1)  | 4092(1) | 11863(1) | 17(1) |
| N(2)  | 10448(1) | 3501(1) | 12945(1) | 17(1) |
| N(3)  | 10379(1) | 2252(1) | 12921(1) | 17(1) |
| N(4)  | 9504(1)  | 1956(1) | 11775(1) | 17(1) |
| N(6)  | 8184(1)  | 3220(1) | 9902(1)  | 14(1) |
| N(8)  | 7976(1)  | 5485(1) | 9625(1)  | 17(1) |
| N(9)  | 6853(1)  | 3905(1) | 8002(1)  | 14(1) |
| N(10) | 6068(1)  | 4643(1) | 6985(2)  | 20(1) |
| N(12) | 6108(1)  | 1924(1) | 6887(2)  | 18(1) |
| N(13) | 7654(1)  | 2122(1) | 9119(1)  | 15(1) |
| N(14) | 6239(1)  | 6970(1) | 1417(1)  | 17(1) |
| O(1)  | 5972(1)  | 5830(1) | 1120(1)  | 24(1) |
| O(2)  | 7049(1)  | 7235(1) | 2588(1)  | 22(1) |
| O(3)  | 5719(1)  | 7847(1) | 536(1)   | 26(1) |
| O(4)  | 7897(1)  | 9556(1) | 10180(1) | 19(1) |

**Table S3.** Bond lengths [ $\text{\AA}$ ] and angles [ $^\circ$ ] for crystal TATT $\cdot$ HNO $_3$ .

|                   |            |                     |            |
|-------------------|------------|---------------------|------------|
| C(5)-N(1)         | 1.3259(14) | N(12)-C(11)-N(9)    | 121.98(9)  |
| C(5)-N(4)         | 1.3432(14) | C(5)-N(1)-N(2)      | 100.07(9)  |
| C(5)-N(6)         | 1.3884(14) | N(3)-N(2)-N(1)      | 114.14(9)  |
| C(7)-N(8)         | 1.3143(14) | N(3)-N(2)-H(2)      | 121.2(12)  |
| C(7)-N(6)         | 1.3406(14) | N(1)-N(2)-H(2)      | 124.5(12)  |
| C(7)-N(9)         | 1.3585(13) | N(2)-N(3)-N(4)      | 107.08(9)  |
| C(11)-N(13)       | 1.3127(14) | N(3)-N(4)-C(5)      | 103.79(9)  |
| C(11)-N(12)       | 1.3308(14) | C(7)-N(6)-C(5)      | 128.18(9)  |
| C(11)-N(9)        | 1.3820(14) | C(7)-N(6)-N(13)     | 112.11(9)  |
| N(1)-N(2)         | 1.3326(13) | C(5)-N(6)-N(13)     | 119.68(9)  |
| N(2)-N(3)         | 1.3134(14) | C(7)-N(8)-H(8A)     | 120.2(11)  |
| N(2)-H(2)         | 1.00(2)    | C(7)-N(8)-H(8B)     | 119.7(12)  |
| N(3)-N(4)         | 1.3311(13) | H(8A)-N(8)-H(8B)    | 120.1(17)  |
| N(6)-N(13)        | 1.4086(12) | C(7)-N(9)-C(11)     | 108.06(8)  |
| N(8)-H(8A)        | 0.915(18)  | C(7)-N(9)-N(10)     | 128.56(9)  |
| N(8)-H(8B)        | 0.849(19)  | C(11)-N(9)-N(10)    | 123.29(9)  |
| N(9)-N(10)        | 1.3932(12) | N(9)-N(10)-H(10A)   | 107.7(11)  |
| N(10)-H(10A)      | 0.890(18)  | N(9)-N(10)-H(10B)   | 108.1(11)  |
| N(10)-H(10B)      | 0.900(19)  | H(10A)-N(10)-H(10B) | 110.0(16)  |
| N(12)-H(12A)      | 0.871(18)  | C(11)-N(12)-H(12A)  | 119.1(12)  |
| N(12)-H(12B)      | 0.897(18)  | C(11)-N(12)-H(12B)  | 118.2(10)  |
| N(14)-O(3)        | 1.2448(13) | H(12A)-N(12)-H(12B) | 122.1(15)  |
| N(14)-O(1)        | 1.2552(12) | C(11)-N(13)-N(6)    | 103.41(8)  |
| N(14)-O(2)        | 1.2637(12) | O(3)-N(14)-O(1)     | 120.31(10) |
| O(4)-H(4A)        | 0.84(2)    | O(3)-N(14)-O(2)     | 119.53(9)  |
| O(4)-H(4B)        | 0.89(2)    | O(1)-N(14)-O(2)     | 120.14(9)  |
|                   |            | H(4A)-O(4)-H(4B)    | 102.4(18)  |
| N(1)-C(5)-N(4)    | 114.92(10) |                     |            |
| N(1)-C(5)-N(6)    | 122.26(10) |                     |            |
| N(4)-C(5)-N(6)    | 122.82(10) |                     |            |
| N(8)-C(7)-N(6)    | 128.90(10) |                     |            |
| N(8)-C(7)-N(9)    | 125.99(10) |                     |            |
| N(6)-C(7)-N(9)    | 105.12(9)  |                     |            |
| N(13)-C(11)-N(12) | 126.71(10) |                     |            |
| N(13)-C(11)-N(9)  | 111.30(9)  |                     |            |

**Table S4.** Anisotropic displacement parameters ( $\text{\AA}^2 \times 10^3$ ) for crystal TATT·HNO<sub>3</sub>.  
 The anisotropic displacement factor exponent takes the form:  $-2\pi^2 [h^2 a^{*2} U^{11} + \dots + 2 h k a^* b^* U^{12}]$

|       | U <sup>11</sup> | U <sup>22</sup> | U <sup>33</sup> | U <sup>23</sup> | U <sup>13</sup> | U <sup>12</sup> |
|-------|-----------------|-----------------|-----------------|-----------------|-----------------|-----------------|
| C(5)  | 14(1)           | 15(1)           | 14(1)           | 1(1)            | 2(1)            | 0(1)            |
| C(7)  | 14(1)           | 13(1)           | 14(1)           | 1(1)            | 2(1)            | 0(1)            |
| C(11) | 16(1)           | 12(1)           | 15(1)           | 1(1)            | 4(1)            | 0(1)            |
| N(1)  | 16(1)           | 15(1)           | 18(1)           | 1(1)            | -1(1)           | -1(1)           |
| N(2)  | 16(1)           | 15(1)           | 18(1)           | 2(1)            | -1(1)           | -1(1)           |
| N(3)  | 16(1)           | 15(1)           | 19(1)           | 1(1)            | 1(1)            | -1(1)           |
| N(4)  | 15(1)           | 15(1)           | 19(1)           | 1(1)            | 0(1)            | 1(1)            |
| N(6)  | 13(1)           | 11(1)           | 16(1)           | 0(1)            | 0(1)            | -1(1)           |
| N(8)  | 18(1)           | 12(1)           | 20(1)           | 0(1)            | -2(1)           | 0(1)            |
| N(9)  | 14(1)           | 11(1)           | 16(1)           | 0(1)            | 0(1)            | 0(1)            |
| N(10) | 17(1)           | 15(1)           | 24(1)           | 2(1)            | -4(1)           | 4(1)            |
| N(12) | 16(1)           | 12(1)           | 22(1)           | 0(1)            | -2(1)           | -1(1)           |
| N(13) | 15(1)           | 11(1)           | 18(1)           | -2(1)           | 0(1)            | -2(1)           |
| N(14) | 18(1)           | 12(1)           | 19(1)           | -1(1)           | 1(1)            | 0(1)            |
| O(1)  | 26(1)           | 11(1)           | 31(1)           | -2(1)           | 0(1)            | -4(1)           |
| O(2)  | 20(1)           | 16(1)           | 26(1)           | 0(1)            | -6(1)           | -1(1)           |
| O(3)  | 24(1)           | 14(1)           | 33(1)           | 1(1)            | -8(1)           | 2(1)            |
| O(4)  | 20(1)           | 13(1)           | 21(1)           | 1(1)            | -3(1)           | 0(1)            |

**Table S5.** Hydrogen coordinates (  $\times 10^4$  ) and isotropic displacement parameters ( $\text{\AA}^2 \times 10^3$ ) for crystal TATT·HNO<sub>3</sub>.

|        | x         | y         | z         | U(eq) |
|--------|-----------|-----------|-----------|-------|
| H(2)   | 11059(14) | 3940(20)  | 13670(30) | 45(5) |
| H(4A)  | 7607(15)  | 9140(20)  | 9190(30)  | 43(5) |
| H(4B)  | 7897(13)  | 10340(20) | 9730(30)  | 42(5) |
| H(8A)  | 8557(13)  | 5663(17)  | 10500(30) | 34(4) |
| H(8B)  | 7621(13)  | 6088(19)  | 9040(20)  | 30(4) |
| H(10A) | 5788(12)  | 5032(18)  | 7850(30)  | 35(4) |
| H(10B) | 6319(13)  | 5225(18)  | 6290(30)  | 33(4) |
| H(12A) | 5585(13)  | 2329(17)  | 6250(20)  | 30(4) |
| H(12B) | 6131(12)  | 1071(17)  | 6970(20)  | 24(4) |

**Table S6.** Torsion angles [ $^{\circ}$ ] for crystal TATT·HNO<sub>3</sub>.

---

|                        |             |
|------------------------|-------------|
| N(4)-C(5)-N(1)-N(2)    | 0.31(12)    |
| N(6)-C(5)-N(1)-N(2)    | -179.00(10) |
| C(5)-N(1)-N(2)-N(3)    | -0.08(11)   |
| N(1)-N(2)-N(3)-N(4)    | -0.17(12)   |
| N(2)-N(3)-N(4)-C(5)    | 0.33(11)    |
| N(1)-C(5)-N(4)-N(3)    | -0.42(12)   |
| N(6)-C(5)-N(4)-N(3)    | 178.89(9)   |
| N(8)-C(7)-N(6)-C(5)    | -1.68(18)   |
| N(9)-C(7)-N(6)-C(5)    | 178.39(10)  |
| N(8)-C(7)-N(6)-N(13)   | -179.63(10) |
| N(9)-C(7)-N(6)-N(13)   | 0.44(11)    |
| N(1)-C(5)-N(6)-C(7)    | -1.87(17)   |
| N(4)-C(5)-N(6)-C(7)    | 178.87(10)  |
| N(1)-C(5)-N(6)-N(13)   | 175.95(9)   |
| N(4)-C(5)-N(6)-N(13)   | -3.31(15)   |
| N(8)-C(7)-N(9)-C(11)   | -179.98(10) |
| N(6)-C(7)-N(9)-C(11)   | -0.05(11)   |
| N(8)-C(7)-N(9)-N(10)   | -3.31(17)   |
| N(6)-C(7)-N(9)-N(10)   | 176.62(10)  |
| N(13)-C(11)-N(9)-C(7)  | -0.39(11)   |
| N(12)-C(11)-N(9)-C(7)  | -179.04(9)  |
| N(13)-C(11)-N(9)-N(10) | -177.27(9)  |
| N(12)-C(11)-N(9)-N(10) | 4.07(15)    |
| N(12)-C(11)-N(13)-N(6) | 179.19(10)  |
| N(9)-C(11)-N(13)-N(6)  | 0.62(11)    |
| C(7)-N(6)-N(13)-C(11)  | -0.67(11)   |
| C(5)-N(6)-N(13)-C(11)  | -178.81(9)  |

---

Symmetry transformations used to generate equivalent atoms

**Table S7.** Hydrogen bonds for crystal TATT·HNO<sub>3</sub> [Å and °].

| D-H...A               | d(D-H)    | d(H...A)  | d(D...A)   | <(DHA)    |
|-----------------------|-----------|-----------|------------|-----------|
| N(2)-H(2)...O(4)#1    | 1.00(2)   | 1.62(2)   | 2.6146(12) | 175.4(18) |
| O(4)-H(4A)...O(2)#2   | 0.84(2)   | 1.89(2)   | 2.7045(12) | 160.7(19) |
| O(4)-H(4A)...N(14)#2  | 0.84(2)   | 2.67(2)   | 3.4908(13) | 164.0(17) |
| N(8)-H(8A)...N(1)     | 0.915(18) | 2.304(18) | 2.8982(14) | 122.3(14) |
| N(8)-H(8A)...N(3)#3   | 0.915(18) | 2.335(18) | 3.1366(13) | 146.2(15) |
| N(10)-H(10A)...O(1)#4 | 0.890(18) | 2.430(18) | 3.2175(14) | 147.7(14) |
| N(12)-H(12A)...O(3)#5 | 0.871(18) | 2.027(18) | 2.8800(13) | 166.0(16) |
| O(4)-H(4B)...N(13)#6  | 0.89(2)   | 1.93(2)   | 2.7947(13) | 165.8(16) |
| N(8)-H(8B)...O(2)#2   | 0.849(19) | 2.101(19) | 2.9349(13) | 167.3(16) |
| N(8)-H(8B)...O(2)#2   | 0.849(19) | 2.101(19) | 2.9349(13) | 167.3(16) |
| N(10)-H(10B)...O(3)#2 | 0.900(19) | 2.204(19) | 2.8273(13) | 125.9(14) |
| N(10)-H(10B)...O(4)#7 | 0.900(19) | 2.484(18) | 3.1842(14) | 135.0(15) |
| N(12)-H(12B)...O(1)#8 | 0.897(18) | 2.079(18) | 2.9371(13) | 159.8(14) |

Symmetry transformations used to generate equivalent atoms:

#1  $-x+2, y-1/2, -z+5/2$  #2  $x, -y+3/2, z+1/2$  #3  $-x+2, y+1/2, -z+5/2$   
 #4  $x, y, z+1$  #5  $-x+1, y-1/2, -z+1/2$  #6  $x, y+1, z$   
 #7  $x, -y+3/2, z-1/2$  #8  $x, -y+1/2, z+1/2$
